# Supplementary material for: Highly efficient construction of infectious viroid-derived clones
Source: PubMed Central journal article supplement (PMC6670230; doi:10.1186/s13007-019-0470-4), 2019-08-01
Supplement: 13007_2019_470_MOESM1_ESM.pdf [file 13007_2019_470_MOESM1_ESM.pdf]

**Additional file 1: Table S1** Detail of the oligos used in this work.

| <b>Oligonucleotide</b>   | <b>Sequence 5'-3'</b>                                   |
|--------------------------|---------------------------------------------------------|
| <i>Fw D1-HSVd</i>        | GGTCTCCCATGGCTGGGGAATTCTCGAGTTG                         |
| <i>Rv D2-HSVd</i>        | GGTCTCAAGGGGCTCAAGAGAGGAT                               |
| <i>Fw D3-HSVd</i>        | GGTCTCCCCCTGCTGGGGAATTCTCGAGTTG                         |
| <i>Rv D4-HSVd</i>        | GGTCTCTCTAGAAGGGGCTCAAGAGAGGAT                          |
| <i>Fw D1-ELVd</i>        | GACGTCTCCCATGGGGTGGTGTGTGCCACCCCT                       |
| <i>Rv D2-ELVd</i>        | GCGCCGTCTCCTATGGGGAGAGGTCGTCCTCTATC                     |
| <i>Fw D3-ELVd</i>        | GCAGCGTCTCTCATAGGGTGGTGTGTGCCACCCCTG                    |
| <i>Rv D4-ELVd</i>        | GCGCCGTCTCGCTAGCTATGGGGAGAGGTCGTCCTCTAT                 |
| <i>Rv Popit</i>          | TGGATGATCTCTTTCTCTTATTCAG                               |
| <i>Fw 35S-AMV</i>        | CATTTGGAGAGGGTTTTTATTTTT                                |
| <i>Fw ccdB-NcoI/b</i>    | GCACCATGGGAGACCATTAGGCACCCAGG                           |
| <i>Rv ccdB-NheI/b</i>    | GCTGCTAGCGAGACCGTCGAGGTGCAGAC                           |
| <i>Fw mut-HindIII</i>    | CCATATACAAGC <sub>c</sub> TTGATAATCGAATTCC              |
| <i>Rv mut-HindIII</i>    | GGAATTCGATTATCAAgGCTTGTATATGG                           |
| <i>Fw T7-35S HindIII</i> | CGAAAGCTTTAATACGACTCACTATAGGCTTACTCGAGCTCGGGCCCTCTACTCC |
| <i>Rv M13</i>            | AGCGGATAACAATTTCACACAGG                                 |
