# Supplementary material for: Highly efficient construction of infectious viroid-derived clones
Source: PubMed Central journal article supplement (PMC6670230; doi:10.1186/s13007-019-0470-4), 2019-08-01
Supplement: 13007_2019_470_MOESM3_ESM.pdf [file 13007_2019_470_MOESM3_ESM.pdf]

**Additional file 3: Table S2:** Details of the viroid related sequences containing the restriction sites used in our method. As can be observed, only the 0,19% of the known viroid variants in both *Pospiviroidae* and *Avsunviroidae* families contain both restriction sites. Viroid sequences were recovered from <https://www.ncbi.nlm.nih.gov/nuccore>.

|                                             | <b>Number</b> | <b>Percentage</b> |
|---------------------------------------------|---------------|-------------------|
| <b>Viroid related sequences</b>             | 11395         | 100%              |
| <b>Containing BsaI sites</b>                | 645           | 5,66%             |
| <b>Containing BsmBI sites</b>               | 503           | 4,41%             |
| <b>Containing both BsaI and BsmBI sites</b> | 22            | 0,19%             |
